# Supplementary material for: Retinoic Acid-Containing Liposomes for the Induction of Antigen-Specific Regulatory T Cells as a Treatment for Autoimmune Diseases
Source: MDPI journal article supplement (doi:10.3390/pharmaceutics13111949), 2021-11-17
Supplement: s1 [file s1]

# Supplementary Materials: Retinoic Acid-Containing Liposomes for the Induction of Antigen-Specific Regulatory T Cells as a Treatment for Autoimmune Diseases

Daniëlle ter Braake, Naomi Benne, Chun Yin Jerry Lau, Enrico Mastrobattista, Femke Broere

## Supplements

hPG-K4-FAM (Theoretical mass=2564.8 Da;  $[M+2H]^{2+}=1283.4$ ,  $[M+3H]^{3+}=855.9$ ,  $[M+4H]^{4+}=642.2$ )

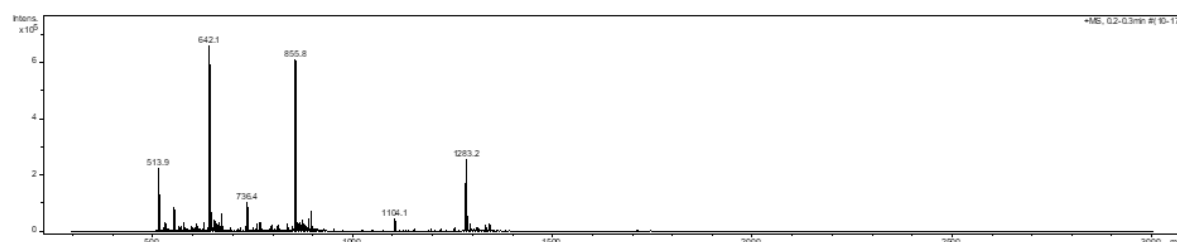

hPG (Theoretical mass=1693.82;  $[M+2H]^{2+}=847.9$ )

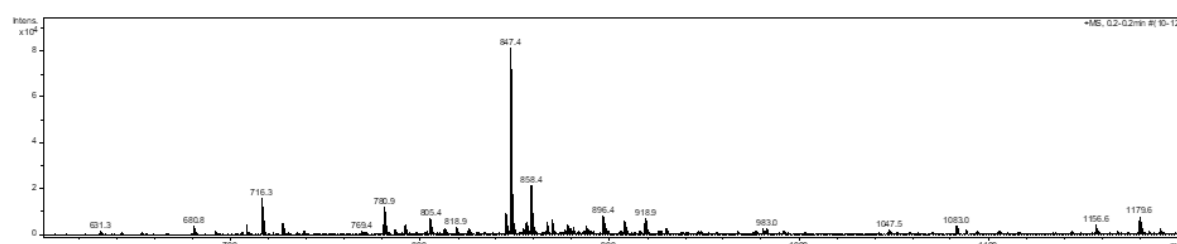

hPG-K4 (Theoretical mass=2206.51;  $[M+2H]^{2+}=1104.3$ ,  $[M+3H]^{3+}=736.5$ )

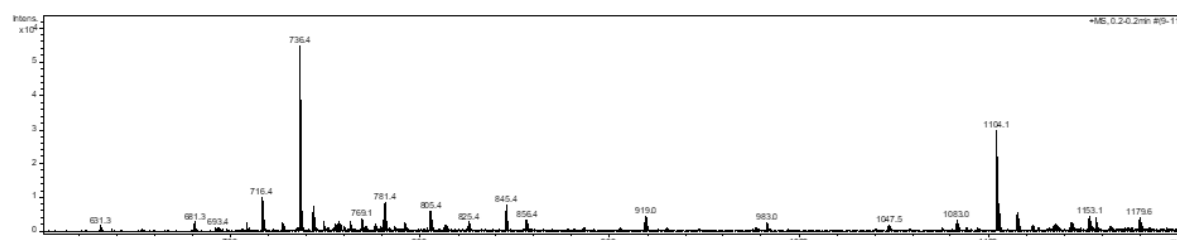

**Figure S1.** Mass spectrometry analysis of the synthesized peptide products.

**Table S1.** properties of hPG-FAM liposomes, means.

| Formulation | Z-average Diameter (nm) | ζ-potential (mV) | PDI   | Encapsulation hPG (%) | Encapsulation RA (%) |
|-------------|-------------------------|------------------|-------|-----------------------|----------------------|
| hPG-FAM     | 197.7                   | -45.6            | 0.105 | 34.4                  | -                    |
| hPG-FAM/RA  | 202.5                   | -41.3            | 0.103 | 38.7                  | 77.3                 |

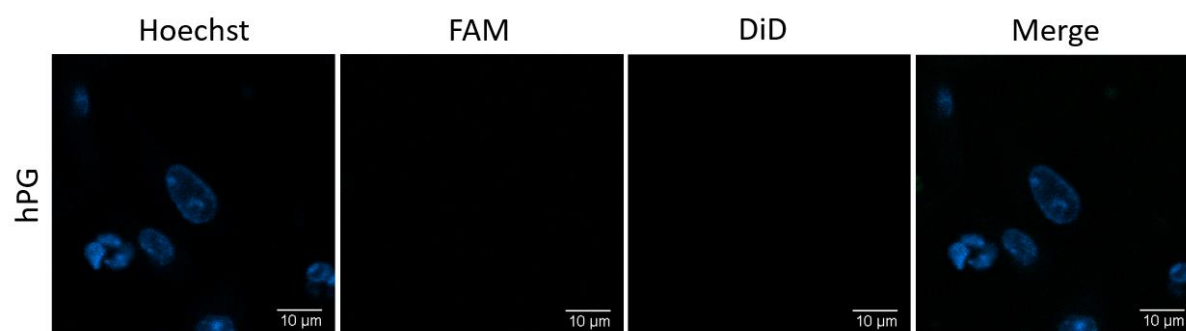

**Figure S2. Background fluorescence from unlabeled hPG.** BMDCs were cultured from the bone marrow of Balb/c mice. BMDCs were stimulated with LPS and cultured in the presence of 1 µg/mL hPG. After 24 hours incubation, cells were washed carefully to remove unbound liposomes. Briefly before imaging, 5 µg/mL Hoechst dye was added to each well.
